# Supplementary material for: Liproxstatin-1 Alleviated Ischemia/Reperfusion-Induced Acute Kidney Injury via Inhibiting Ferroptosis
Source: MDPI journal article supplement (doi:10.3390/antiox13020182), 2024-01-31
Supplement: s1 [file s1]

**Supplementary Table S2** Primer sequences used for RT-qPCR.

| Species | Gene           |   | Sequence (5' to 3')     |
|---------|----------------|---|-------------------------|
| Mouse   | $\beta$ -actin | F | GGCTGTATTCCCCTCCATCG    |
|         |                | R | CCAGTTGGTAACAATGCCATGT  |
|         | Egr1           | F | TCGGCTCCTTTCCTCACTCA    |
|         |                | R | CTCATAGGGTTGTTTCGCTCGG  |
|         | Trp53          | F | GTCACAGCACATGACGGAGG    |
|         |                | R | TCTTCCAGATGCTCGGGATAC   |
|         | Slc7a11        | F | GGCACCAGTCATCGGATCAG    |
|         |                | R | CTCCACAGGCAGACCAGAAAA   |
|         | Gpx4           | F | GCCTGGATAAGTACAGGGGTT   |
|         |                | R | CATGCAGATCGACTAGCTGAG   |
|         | Ccl2           | F | TTAAAAACCTGGATCGGAACCAA |
|         |                | R | GCATTAGCTTCAGATTACGGGT  |
|         | Tnf $\alpha$   | F | GACGTGGAAGTGGCAGAAGAG   |
|         |                | R | TTGGTGGTTTGTGAGTGTGAG   |
|         | Ifn $\gamma$   | F | ATGAACGCTACACACTGCATC   |
|         |                | R | CCATCCTTTTGCCAGTTCCTC   |
|         | Il1 $\beta$    | F | GCAACTGTTTCCTGAACTCAACT |
|         |                | R | ATCTTTTGGGGTCCGTCAACT   |
|         | Il6            | F | CCAAGAGGTGAGTGCTTCCC    |
|         |                | R | CTGTTGTTTCAGACTCTCTCCCT |
| Homo    | $\beta$ -actin | F | CGTGCGTGACATTAAGGAGAAG  |
|         |                | R | GGAAGGAAGGCTGGAAGAGTG   |
|         | EGR1           | F | CTGCGACATCTGTGGAAGAAA   |
|         |                | R | TGTCTGCTTTCTTGTCTTCTG   |
|         | TP53           | F | CCCAAGCAATGGATGATTTGA   |
|         |                | R | GGCATTCTGGGAGCTTCATCT   |
|         | SLC7A11        | F | TCTCCAAAGGAGGTTACCTGC   |
|         |                | R | AGACTCCCCTCAGTAAAGTGAC  |
|         | GPX4           | F | TGGGAAATGCCATCAAGTGG    |
|         |                | R | GGTCCTTCTCTATCACCAGGGG  |
|         | CCL2           | F | CAGCCAGATGCAATCAATGCC   |
|         |                | R | TGGAATCCTGAACCCACTTCT   |
